# Supplementary material
Source: MDPI journal article supplement (https://www.mdpi.com/2072-4292/8/10/815)
Supplement: s1 [file s1]

# Supplementary Materials: Evaluation of Aqua MODIS Collection 6 AOD Parameters for Air Quality Research over the Continental United States

Jessica H. Belle and Yang Liu

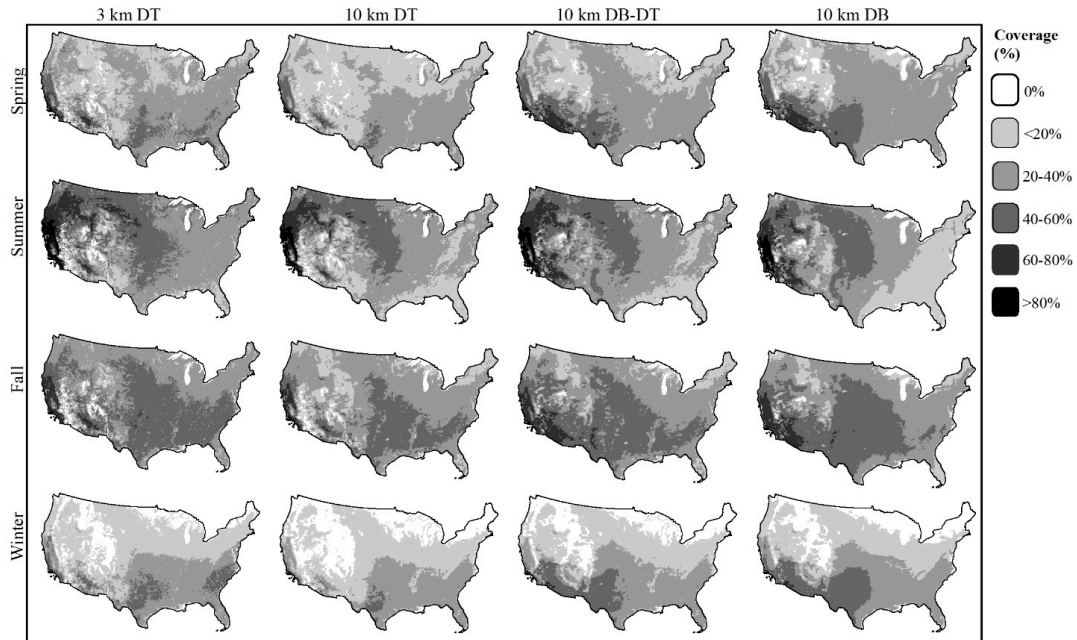

**Figure S1.** Seasonal mean coverage statistics for high confidence AOD retrievals in the CONUS for 10 km DT, 3 km DT, 10 km DB-DT, and 10 km DB. Coverage is calculated as the percentage of days between 1 January 2004 and 31 December 2013 with a valid MODIS retrieval from Aqua.

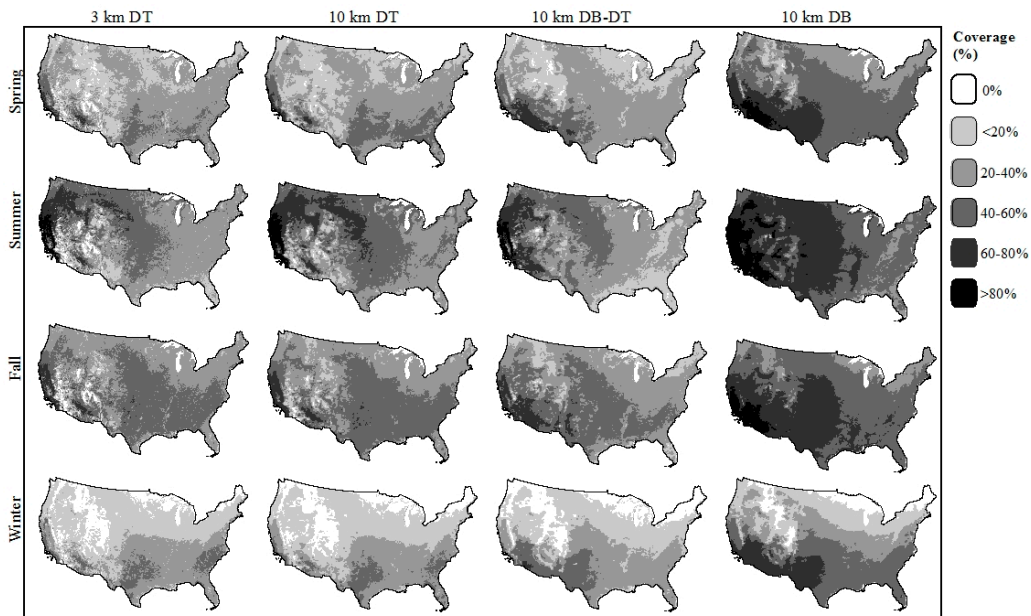

**Figure S2.** Seasonal mean coverage statistics for all confidence AOD retrievals in the CONUS for 10 km DT, 3 km DT, 10 km DB-DT, and 10 km DB. Coverage is calculated as the percentage of days between 1 January 2004 and 31 December 2013 with a valid MODIS retrieval from Aqua.

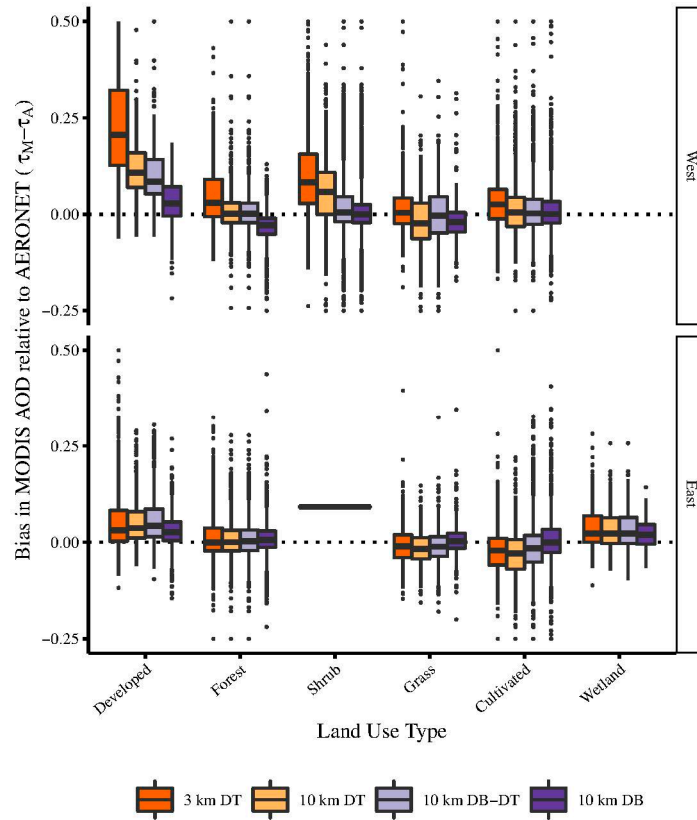

**Figure S3.** Boxplot showing the distribution of collocation-specific biases in MODIS AOD relative to AERONET, within categories of land use, resolution, and algorithm. For each box, the midline represents the median, upper and lower hinges represent the 25th and 75th percentiles, whiskers extend out to 1.5 times the interquartile range (IQR), and points represent observations outside of  $1.5 \times QR$ . Only MODIS AOD parameters within categories of resolution, algorithm, and QAC value with at least 5000 collocations are shown.

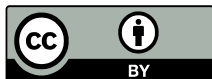

© 2016 by the authors; licensee MDPI, Basel, Switzerland. This article is an open access article distributed under the terms and conditions of the Creative Commons by Attribution (CC-BY) license (<http://creativecommons.org/licenses/by/4.0/>).
